# Supplementary material for: Endogenous FGF21-signaling controls paradoxical obesity resistance of UCP1-deficient mice
Source: PubMed Central journal article supplement (PMC6994690; doi:10.1038/s41467-019-14069-2), 2020-01-31
Supplement: 41467_2019_14069_MOESM1_ESM.pdf [file 41467_2019_14069_MOESM1_ESM.pdf]

Supplemental material

**Endogenous FGF21-signaling controls paradoxical obesity  
resistance of UCP1-deficient mice**

Susanne Keipert<sup>1,2,3#</sup>, Dominik Lutter<sup>1,2</sup>, Bjoern O. Schroeder<sup>4</sup>, Daniel Brandt<sup>1,2</sup>, Marcus Stählmann<sup>4</sup>, Thomas Schwarzmayr<sup>5</sup>, Elisabeth Graf<sup>5</sup>, Helmut Fuchs<sup>6</sup>, Martin Hrabe de Angelis<sup>2,6,7</sup>, Matthias H. Tschöp<sup>1,2,8</sup>, Jan Rozman<sup>2,6</sup>, Martin Jastroch<sup>1,2,3#</sup>

**Supplemental Figure 1**

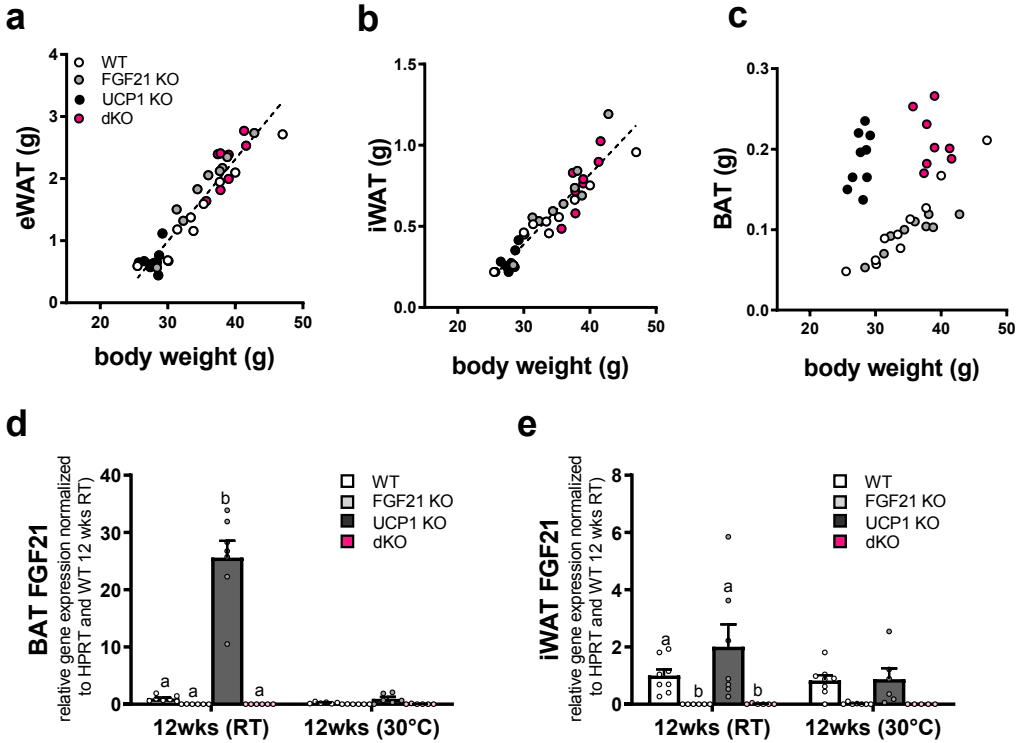

Figure S1 (related to figure 2): WT, FGF21 KO, UCP1 KO and UCP1/FGF21 dKO mice were weaned and raised at 30°C. At the age of 10-12 wks, animals were transferred from 30°C to 23°C, and the diet was changed to high fat diet (HFD) for 12 weeks. Body weights (x-axis) were plotted against tissue weights of (a) (e)pididymal, (b) (i)nguinal WAT and (c) BAT. FGF21 gene expression in (d) BAT and (e) iWAT after 12 weeks of HFD at 23°C (room temperature; RT) or 30°C. a-c: n = 10/9/9/8 WT/ FGF21 KO/ UCP1 KO/ dKO; d-e: n = 7/6/7/6 – 6/6/6/6 WT/ FGF21 KO/ UCP1 KO/ dKO 23°C - WT/ FGF21 KO/ UCP1 KO/ dKO 30°C. Data (d-e) were analyzed by one-way ANOVA followed by Bonferroni test and presented as mean + SEM with different letters indicating significant differences (P < 0.05).

## Supplemental Figure 2

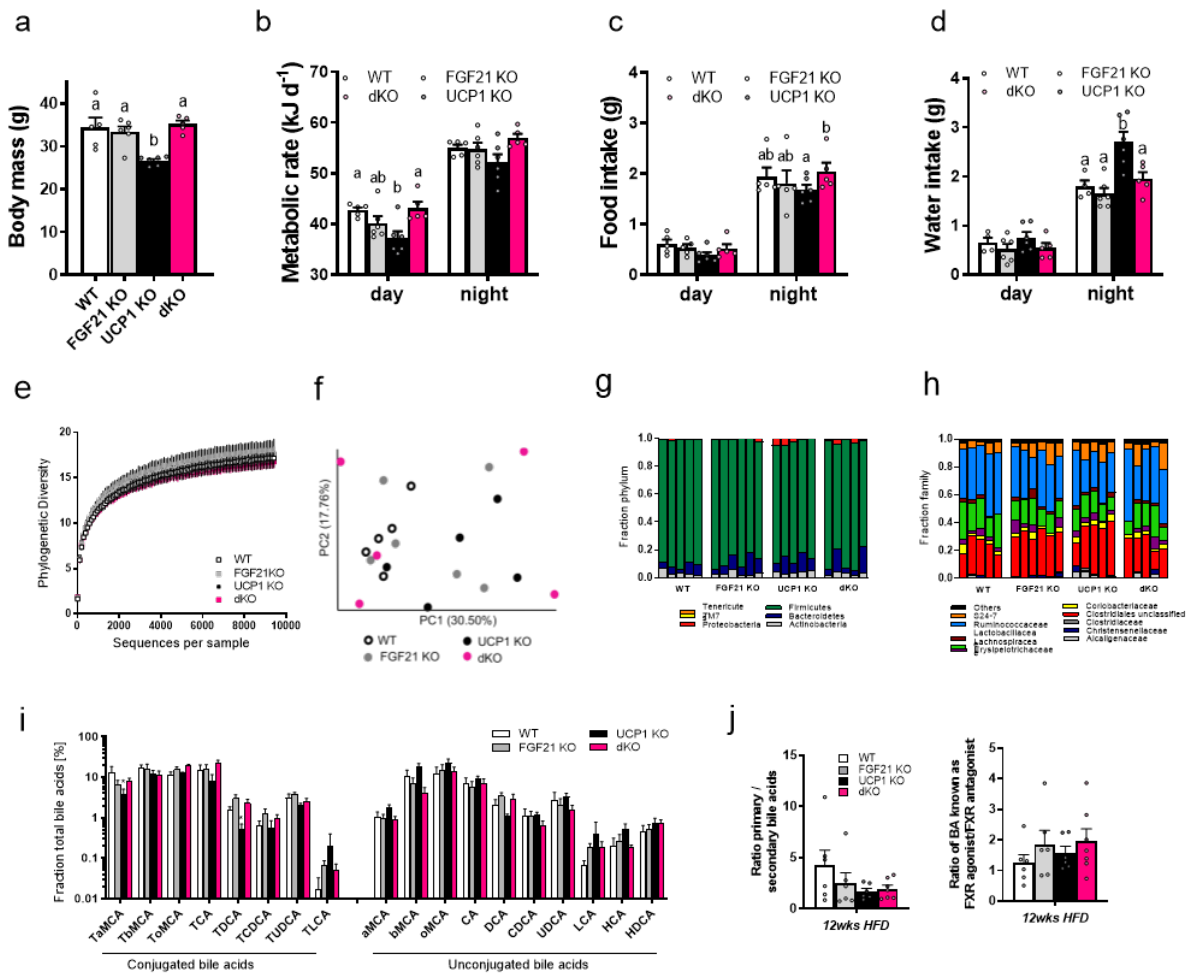

Figure S2 (related to figure 3): WT, FGF21 KO, UCP1 KO and UCP1/FGF21 dKO mice were weaned and raised at 30°C. At the age of 10-12 wks, animals were transferred from 30°C to 23°C, and to high fat diet (HFD). After 9 wks HFD feeding the animals were placed into an indirect calorimetry system. (a) Mean body weight, (b) metabolic rate, (c) food intake and (d) water intake were measured. After 12 wks HFD feeding, feces and serum were collected. (e) Alpha rarefaction plot displays species richness dependent on sampling depth (max depth = 9,410 sequences per sample). (f) Principal coordinate analysis (PCoA, weighted UniFrac) displays  $\beta$ -diversity of the gut microbial community. The percentage of the variation explained by the plotted principal coordinates is indicated at the axis labels. Each dot represents a caecal community. Relative abundance at (g) phylum and (h) family level in caecal community of mice. Only relative abundances > 1% are displayed. (i) Plasma bile acid (BA) profile and (j) ratio of primary to secondary BAs and ratio of BAs, known as FXR agonist/FXR antagonist. a, b: n = 5/6/6/5 WT/ FGF21 KO/ UCP1 KO/ dKO; c: n = 5/5/6/5; d: n = 4/6/6/5; i: n = 6/6/6/6; j: n = 6/6/6/7. Data (a-d) were analyzed by one-way ANOVA followed by Bonferroni test and presented as mean + SEM with different letters indicating significant differences ( $P < 0.05$ ). Data are presented as mean  $\pm$  SD (e) or mean + SEM (i-j) with significant differences shown as \* $P < 0.05$ .

## Supplemental Figure 3

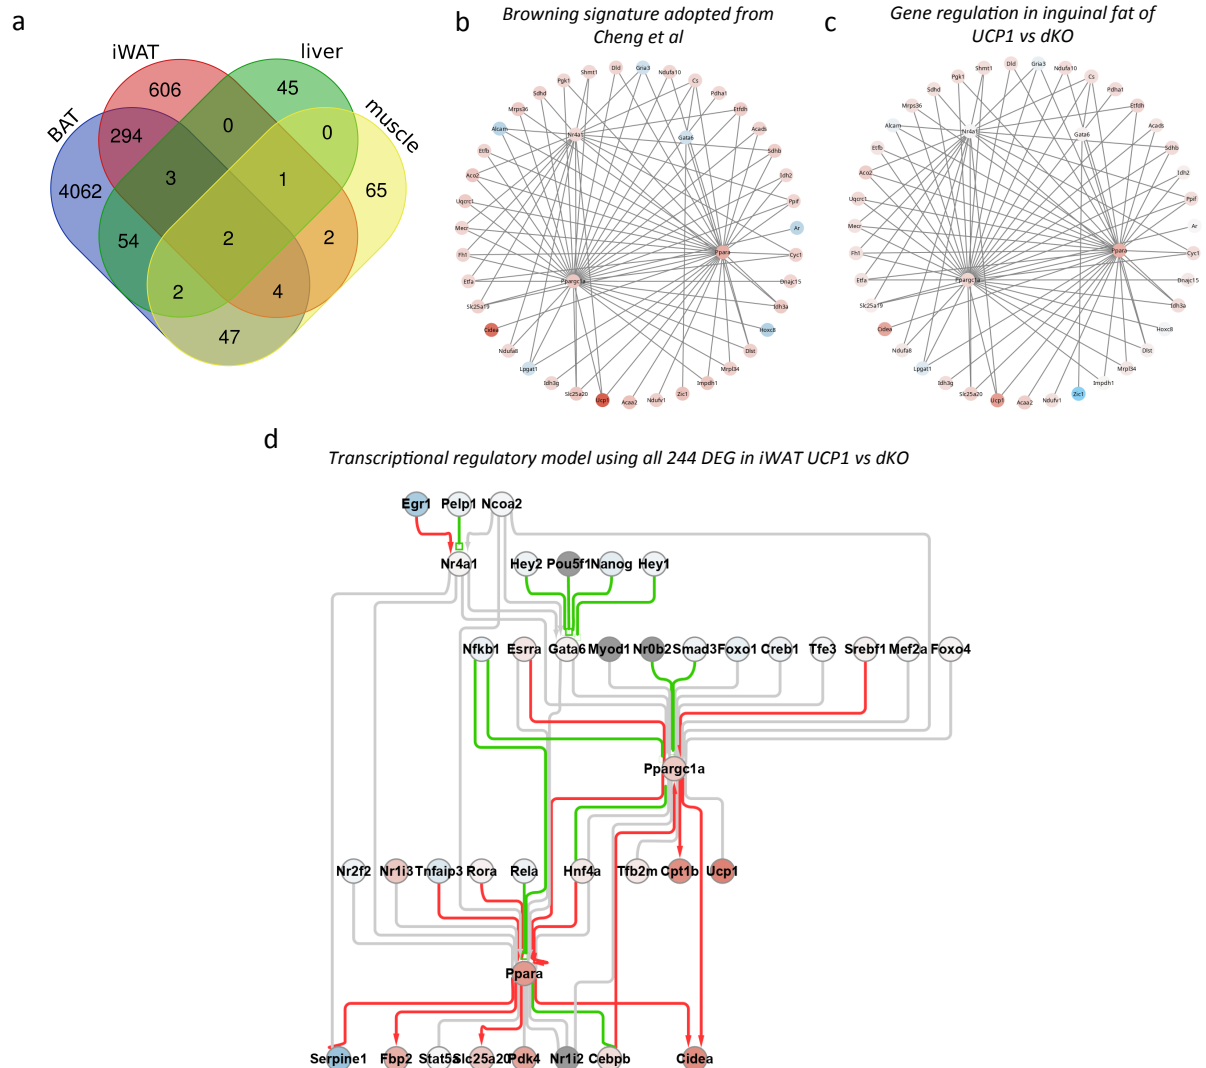

Figure S3 (related to figure 5): WT, FGF21 KO, UCP1 KO and UCP1/FGF21 dKO mice were weaned and raised at 30°C. At the age of 10-12 wks, animals were transferred from 30°C to 23°C, and diet was changed to high fat diet (HFD) for 3 wks. (a) Venn analysis of significantly expressed transcripts of all tissues (adjusted p-value < 0.01). (b) Model predicting regulation of browning adopted from Cheng et al. 2018, Cell Reports; and (c) model applied to regulated genes of UCP1 KO vs dKO in iWAT. Node colors correspond to the log<sub>2</sub> FC of UCP1 KO vs dKO in iWAT. (d) Main regulators of browning were taken from S4a and S4b (Gata6, Ppargc1a, Nr4a1, Ppara). TRRUST (<https://www.grnpedia.org/trrust/>) database was used to create a transcriptional regulatory model using all 244 DEG in iWAT, UCP1 KO vs dKO (adjusted p-value < 0.001). Only direct interactions with the known browning factors were selected. Network visualization was performed using cytoscape. Node colors refer to log<sub>2</sub> FC (red = upregulation, blue = downregulation). Genes in gray were added by the TRRUST database. Edge colors refer to regulation type: red activation, green = repression, gray = unknown (n=5/5/5/5 WT/ FGF21 KO/ UCP1 KO/ dKO).

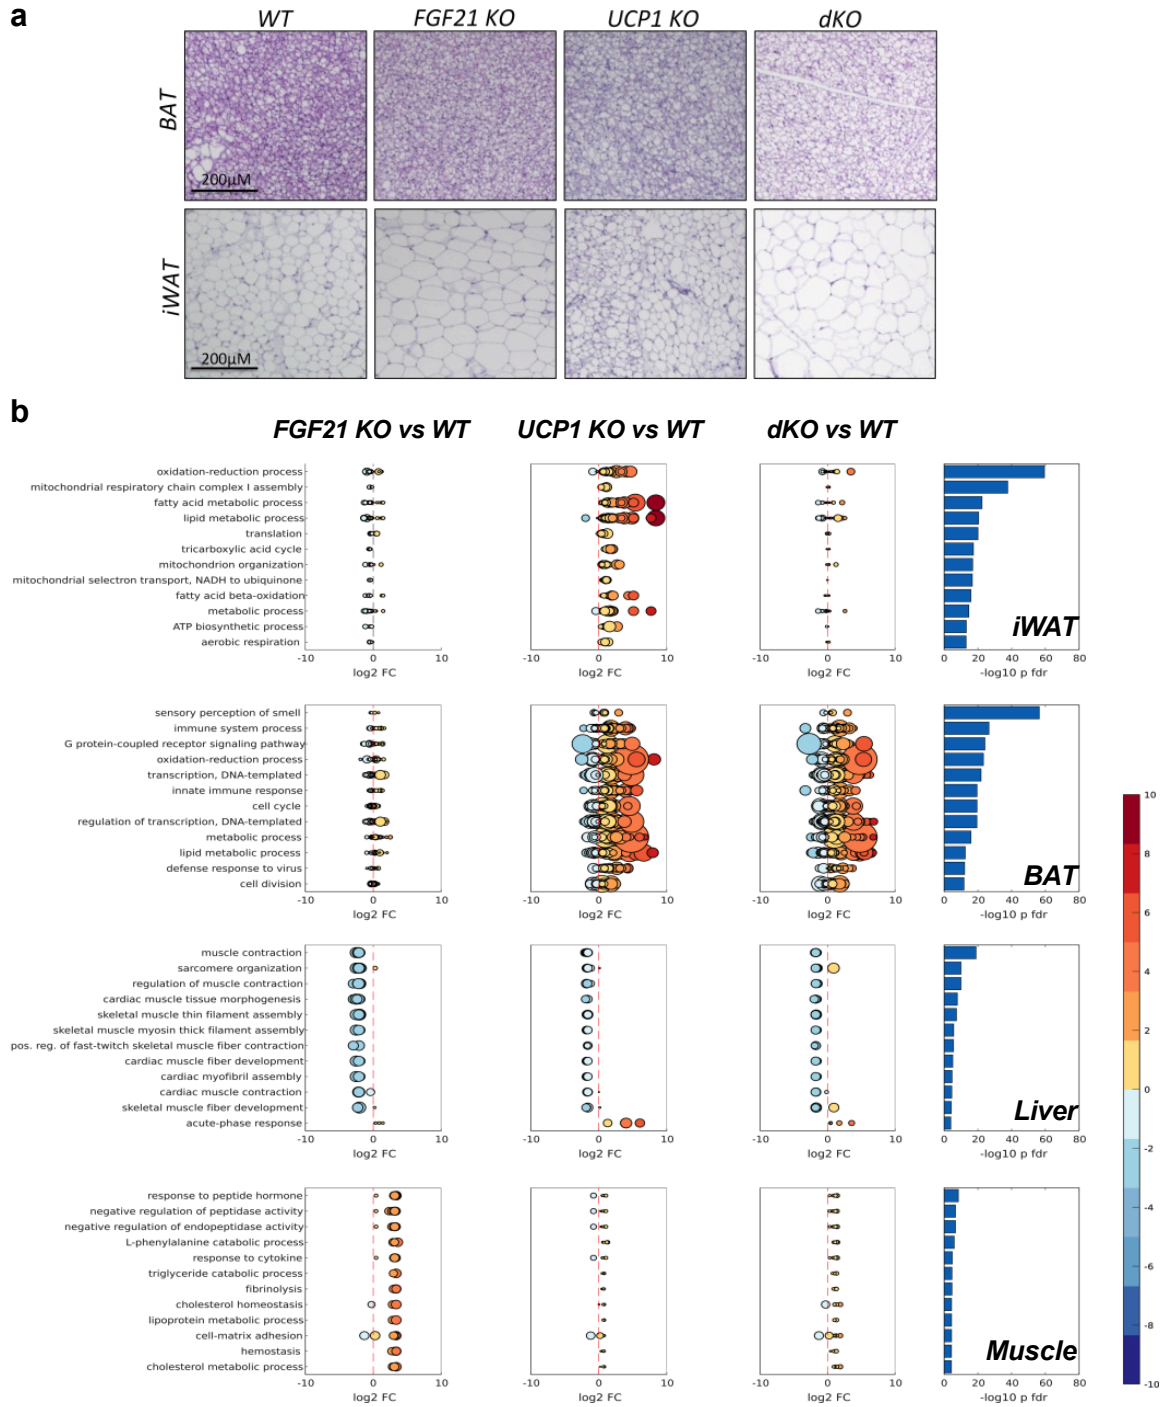

# Supplemental Table1

## List of urine metabolites (AbsoluteIDQ p180 Kit - Biocrates Life Science AG)

AbsoluteIDQ p180 Kit (Biocrates Life Science AG); all data normalized to Creatinine ([ $\mu\text{mol}/\text{mmol}$  Creatinine])

|                |                     | WT     |       | FGF21 KO |       | dKO    |       | UCP1 KO |        |                      |             | WT    |       | FGF21 KO |       | dKO   |       | UCP1 KO |       |
|----------------|---------------------|--------|-------|----------|-------|--------|-------|---------|--------|----------------------|-------------|-------|-------|----------|-------|-------|-------|---------|-------|
|                |                     | Mean   | SE    | Mean     | SE    | Mean   | SE    | Mean    | SE     |                      |             | Mean  | SE    | Mean     | SE    | Mean  | SE    | Mean    | SE    |
| Aminoacids     | Gly                 | 134,1  | 5,9   | 146,7    | 4,1   | 138,9  | 5,5   | 124,2   | 6,3    | Phosphatidylcholines | PC ae C38:6 | 34,65 | 2,19  | 37,47    | 5,46  | 35,24 | 1,54  | 38,75   | 4,38  |
| Aminoacids     | Gln                 | 81,6   | 4,8   | 87,7     | 17,1  | 79,6   | 4,2   | 100,3   | 13,4   | Phosphatidylcholines | PC ae C38:5 | 6,35  | 0,44  | 7,56     | 1,28  | 5,20  | 0,28  | 6,53    | 1,17  |
| Aminoacids     | Ala                 | 44,2   | 1,3   | 37,94    | 1,663 | 46,2   | 1,7   | 58,8    | 2,775  | Phosphatidylcholines | PC aa C38:0 | 3,30  | 0,22  | 3,64     | 0,51  | 3,66  | 0,25  | 4,02    | 0,48  |
| Aminoacids     | Thr                 | 44,0   | 2,5   | 29,2     | 1,4   | 41,3   | 2,4   | 64,7    | 4,2    | Phosphatidylcholines | PC ae C36:4 | 2,83  | 0,19  | 3,52     | 0,62  | 2,51  | 0,17  | 3,55    | 0,76  |
| Aminoacids     | Met                 | 29,4   | 2,5   | 23,0     | 6,2   | 24,6   | 2,9   | 37,04   | 4,435  | Phosphatidylcholines | PC aa C40:5 | 2,20  | 0,20  | 2,25     | 0,46  | 1,18  | 0,10  | 1,38    | 0,20  |
| Aminoacids     | Glu                 | 22,8   | 2,5   | 22,7     | 2,2   | 24,9   | 1,5   | 25,1    | 1,9    | Phosphatidylcholines | PC ae C40:6 | 1,97  | 0,17  | 2,02     | 0,29  | 1,85  | 0,15  | 2,13    | 0,29  |
| Aminoacids     | Leu                 | 22,1   | 1,1   | 23,7     | 1,7   | 23,2   | 1,1   | 26,9    | 1,8    | Phosphatidylcholines | PC aa C36:0 | 1,66  | 0,10  | 2,00     | 0,33  | 1,77  | 0,11  | 2,13    | 0,30  |
| Aminoacids     | Ser                 | 18,7   | 0,8   | 17,7     | 1,8   | 18,2   | 0,8   | 20,0    | 2,2    | Phosphatidylcholines | PC ae C36:5 | 1,55  | 0,09  | 2,06     | 0,41  | 1,60  | 0,11  | 2,19    | 0,47  |
| Aminoacids     | Tyr                 | 17,4   | 0,8   | 19,3     | 4,6   | 15,8   | 0,8   | 27,8    | 5,2    | Phosphatidylcholines | PC ae C34:1 | 1,20  | 0,12  | 1,15     | 0,24  | 0,95  | 0,10  | 0,94    | 0,14  |
| Aminoacids     | Lys                 | 16,9   | 0,9   | 15,6     | 1,3   | 17,0   | 1,0   | 18,5    | 2,0    | Phosphatidylcholines | PC aa C38:5 | 0,906 | 0,066 | 1,076    | 0,239 | 0,735 | 0,058 | 0,930   | 0,160 |
| Aminoacids     | Pro                 | 15,0   | 1,0   | 13,8     | 2,3   | 14,6   | 0,6   | 21,9    | 2,9    | Phosphatidylcholines | PC aa C38:1 | 0,822 | 0,042 | 0,989    | 0,123 | 0,977 | 0,063 | 1,112   | 0,165 |
| Aminoacids     | Asn                 | 14,9   | 0,5   | 13,9     | 1,0   | 15,5   | 0,4   | 15,2    | 1,3    | Phosphatidylcholines | PC ae C34:2 | 0,775 | 0,061 | 0,835    | 0,165 | 0,674 | 0,065 | 0,703   | 0,101 |
| Aminoacids     | His                 | 11,6   | 0,5   | 11,2     | 1,7   | 12,9   | 0,5   | 15,1    | 1,6    | Phosphatidylcholines | PC ae C38:4 | 0,768 | 0,053 | 0,967    | 0,196 | 0,734 | 0,038 | 0,995   | 0,206 |
| Aminoacids     | Val                 | 11,4   | 0,6   | 11,4     | 0,9   | 12,2   | 0,7   | 13,9    | 1,2    | Phosphatidylcholines | PC aa C36:6 | 0,548 | 0,033 | 0,627    | 0,103 | 0,587 | 0,040 | 0,623   | 0,083 |
| Aminoacids     | Arg                 | 9,7    | 0,5   | 8,5      | 0,9   | 9,5    | 0,6   | 8,4     | 0,9    | Phosphatidylcholines | PC aa C40:4 | 0,540 | 0,039 | 0,720    | 0,168 | 0,444 | 0,025 | 0,691   | 0,173 |
| Aminoacids     | Phe                 | 9,4    | 0,3   | 10,3     | 1,5   | 10,0   | 0,6   | 13,7    | 1,4    | Phosphatidylcholines | PC aa C38:3 | 0,483 | 0,042 | 0,584    | 0,126 | 0,255 | 0,024 | 0,358   | 0,069 |
| Aminoacids     | Ile                 | 8,0    | 0,4   | 8,7      | 0,7   | 9,0    | 0,6   | 11,5    | 0,7    | Phosphatidylcholines | PC ae C32:1 | 0,385 | 0,040 | 0,432    | 0,094 | 0,304 | 0,044 | 0,318   | 0,054 |
| Aminoacids     | Orn                 | 5,3    | 0,2   | 5,0      | 0,5   | 5,3    | 0,4   | 6,2     | 0,5    | Phosphatidylcholines | PC ae C36:3 | 0,383 | 0,029 | 0,399    | 0,076 | 0,337 | 0,021 | 0,361   | 0,052 |
| Aminoacids     | Asp                 | 4,4    | 0,2   | 4,1      | 0,3   | 4,1    | 0,2   | 5,0     | 0,5    | Phosphatidylcholines | PC aa C38:6 | 0,308 | 0,020 | 0,354    | 0,059 | 0,313 | 0,023 | 0,351   | 0,053 |
| Aminoacids     | Trp                 | 2,2    | 0,1   | 2,4      | 0,3   | 2,4    | 0,2   | 3,1     | 0,3    | Phosphatidylcholines | PC ae C30:0 | 0,265 | 0,024 | 0,302    | 0,069 | 0,205 | 0,025 | 0,245   | 0,043 |
| Aminoacids     | Cit                 | 2,0    | 0,1   | 2,1      | 0,3   | 2,0    | 0,1   | 2,4     | 0,2    | Phosphatidylcholines | PC ae C40:5 | 0,251 | 0,022 | 0,274    | 0,046 | 0,194 | 0,010 | 0,249   | 0,047 |
| Biogenic Amins | Creatinine          | 1000,0 | 0,0   | 1000,0   | 0,0   | 1000,0 | 0,0   | 1000,0  | 0,0    | Phosphatidylcholines | PC aa C40:6 | 0,250 | 0,017 | 0,266    | 0,050 | 0,185 | 0,011 | 0,232   | 0,026 |
| Biogenic Amins | Putrescine          | 44,4   | 3,2   | 37,9     | 8,1   | 37,2   | 2,6   | 50,9    | 4,2    | Phosphatidylcholines | PC aa C38:4 | 0,238 | 0,016 | 0,321    | 0,072 | 0,177 | 0,011 | 0,251   | 0,056 |
| Biogenic Amins | Met-SO              | 29,4   | 1,4   | 23,8     | 2,5   | 29,7   | 2,4   | 33,6    | 3,4    | Phosphatidylcholines | PC aa C36:1 | 0,223 | 0,016 | 0,248    | 0,047 | 0,167 | 0,012 | 0,197   | 0,027 |
| Biogenic Amins | alpha-AAA           | 22,9   | 4,7   | 3,9      | 0,9   | 9,9    | 2,3   | 26,2    | 8,8    | Phosphatidylcholines | PC aa C36:3 | 0,204 | 0,014 | 0,288    | 0,079 | 0,153 | 0,011 | 0,244   | 0,059 |
| Biogenic Amins | ADMA                | 12,8   | 0,5   | 11,4     | 1,2   | 13,5   | 0,4   | 16,3    | 0,8    | Phosphatidylcholines | PC aa C42:4 | 0,171 | 0,013 | 0,197    | 0,040 | 0,125 | 0,010 | 0,172   | 0,029 |
| Biogenic Amins | Carnosine           | 6,7    | 0,6   | 5,8      | 1,3   | 4,9    | 0,6   | 6,4     | 0,8    | Phosphatidylcholines | PC ae C36:2 | 0,149 | 0,013 | 0,152    | 0,024 | 0,139 | 0,010 | 0,149   | 0,020 |
| Biogenic Amins | t4-OH-Pro           | 5,0    | 0,4   | 4,3      | 0,4   | 4,4    | 0,6   | 5,4     | 0,8    | Phosphatidylcholines | PC aa C36:5 | 0,125 | 0,007 | 0,156    | 0,031 | 0,115 | 0,006 | 0,146   | 0,030 |
| Biogenic Amins | Spermidine          | 3,6    | 0,2   | 2,7      | 0,1   | 3,1    | 0,4   | 2,3     | 0,1    | Phosphatidylcholines | PC aa C34:1 | 0,108 | 0,007 | 0,135    | 0,027 | 0,101 | 0,009 | 0,119   | 0,019 |
| Biogenic Amins | Sarcosine           | 3,2    | 0,3   | 3,6      | 0,7   | 4,0    | 0,4   | 5,8     | 1,0    | Phosphatidylcholines | PC ae C34:0 | 0,103 | 0,010 | 0,096    | 0,020 | 0,078 | 0,006 | 0,089   | 0,014 |
| Biogenic Amins | Serotonin           | 0,9    | 0,0   | 0,8      | 0,1   | 1,0    | 0,0   | 1,1     | 0,0    | Phosphatidylcholines | PC aa C36:4 | 0,098 | 0,006 | 0,135    | 0,029 | 0,097 | 0,005 | 0,136   | 0,031 |
| Biogenic Amins | Dopamine            | 0,78   | 0,08  | 0,84     | 0,04  | 1,17   | 0,09  | 1,24    | 0,06   | Phosphatidylcholines | PC aa C32:0 | 0,094 | 0,007 | 0,109    | 0,019 | 0,085 | 0,006 | 0,103   | 0,015 |
| Biogenic Amins | Histamine           | 0,61   | 0,03  | 0,60     | 0,09  | 0,63   | 0,04  | 0,8038  | 0,0463 | Phosphatidylcholines | PC ae C34:3 | 0,094 | 0,006 | 0,120    | 0,023 | 0,095 | 0,009 | 0,126   | 0,026 |
| Biogenic Amins | Ac-Orn              | 0,3    | 0,0   | 0,2      | 0,0   | 0,3    | 0,0   | 0,4     | 0,0    | Phosphatidylcholines | PC ae C38:0 | 0,077 | 0,005 | 0,087    | 0,012 | 0,085 | 0,006 | 0,096   | 0,012 |
| Biogenic Amins | Spermine            | 0,2    | 0,0   | 0,2      | 0,0   | 0,2    | 0,0   | 0,3     | 0,0    | Phosphatidylcholines | PC aa C42:5 | 0,076 | 0,009 | 0,073    | 0,012 | 0,031 | 0,002 | 0,042   | 0,006 |
| Biogenic Amins | PEA                 | 0,22   | 0,01  | 0,23     | 0,05  | 0,20   | 0,01  | 0,37    | 0,07   | Phosphatidylcholines | PC aa C40:3 | 0,072 | 0,005 | 0,103    | 0,029 | 0,054 | 0,006 | 0,090   | 0,022 |
| Biogenic Amins | DOPA                | 0,06   | 0,01  | 0,09     | 0,01  | 0,08   | 0,01  | 0,11    | 0,02   | Phosphatidylcholines | PC aa C42:6 | 0,072 | 0,006 | 0,070    | 0,016 | 0,036 | 0,003 | 0,055   | 0,006 |
| Biogenic Amins | Kynurenine          | 0,04   | 0,00  | 0,04     | 0,00  | 0,05   | 0,00  | 0,06    | 0,00   | Phosphatidylcholines | PC aa C36:2 | 0,069 | 0,004 | 0,083    | 0,016 | 0,066 | 0,007 | 0,081   | 0,012 |
| Acylcarnitines | CO (free Carnitine) | 15,199 | 2,05  | 7,885    | 1,36  | 17,298 | 2,59  | 20,746  | 3,41   | Phosphatidylcholines | PC ae C36:1 | 0,067 | 0,006 | 0,071    | 0,012 | 0,060 | 0,005 | 0,069   | 0,009 |
| Acylcarnitines | C2 (AcylCar)        | 3,370  | 0,23  | 2,879    | 0,33  | 3,565  | 0,37  | 4,196   | 0,41   | Phosphatidylcholines | PC ae C38:3 | 0,054 | 0,004 | 0,059    | 0,012 | 0,043 | 0,002 | 0,055   | 0,010 |
| Acylcarnitines | C3-DC (C4-OH)       | 0,245  | 0,02  | 0,173    | 0,02  | 0,286  | 0,03  | 0,350   | 0,038  | Phosphatidylcholines | PC aa C34:2 | 0,052 | 0,003 | 0,059    | 0,011 | 0,061 | 0,009 | 0,062   | 0,008 |
| Acylcarnitines | C6 (C4:1-DC)        | 0,231  | 0,010 | 0,203    | 0,017 | 0,229  | 0,013 | 0,302   | 0,018  | Phosphatidylcholines | PC ae C40:4 | 0,049 | 0,004 | 0,057    | 0,010 | 0,048 | 0,004 | 0,061   | 0,009 |
| Acylcarnitines | C5-M-DC             | 0,201  | 0,008 | 0,251    | 0,032 | 0,240  | 0,010 | 0,377   | 0,044  | Phosphatidylcholines | PC ae C32:2 | 0,047 | 0,003 | 0,061    | 0,011 | 0,050 | 0,005 | 0,064   | 0,013 |
| Acylcarnitines | C4                  | 0,179  | 0,009 | 0,132    | 0,007 | 0,166  | 0,010 | 0,206   | 0,020  | Phosphatidylcholines | PC aa C34:4 | 0,033 | 0,002 | 0,042    | 0,008 | 0,032 | 0,002 | 0,046   | 0,011 |
| Acylcarnitines | C5-OH (C3-DC-M)     | 0,160  | 0,009 | 0,126    | 0,004 | 0,188  | 0,015 | 0,233   | 0,018  | Phosphatidylcholines | PC aa C32:1 | 0,032 | 0,003 | 0,035    | 0,007 | 0,027 | 0,003 | 0,030   | 0,005 |
| Acylcarnitines | C5-DC (C6-OH)       | 0,151  | 0,007 | 0,118    | 0,005 | 0,174  | 0,008 | 0,243   | 0,022  | Phosphatidylcholines | PC aa C40:2 | 0,032 | 0,002 | 0,045    | 0,012 | 0,033 | 0,002 | 0,046   | 0,010 |
| Acylcarnitines | C9                  | 0,107  | 0,005 | 0,091    | 0,012 | 0,114  | 0,013 | 0,161   | 0,018  | Phosphatidylcholines | PC ae C30:1 | 0,015 | 0,002 | 0,019    | 0,003 | 0,014 | 0,002 | 0,017   | 0,004 |
| Acylcarnitines | C8                  | 0,087  | 0,004 | 0,081    | 0,009 | 0,094  | 0,003 | 0,123   | 0,006  | Phosphatidylcholines | PC ae C38:2 | 0,012 | 0,001 | 0,013    | 0,002 | 0,013 | 0,001 | 0,016   | 0,003 |
| Acylcarnitines | C7-DC               | 0,081  | 0,010 | 0,076    | 0,012 | 0,158  | 0,013 | 0,145   | 0,011  | Phosphatidylcholines | PC ae C38:1 | 0,012 | 0,001 | 0,014    | 0,002 | 0,013 | 0,001 | 0,016   | 0,002 |
| Acylcarnitines | C10                 | 0,068  | 0,003 | 0,071    | 0,007 | 0,090  | 0,003 | 0,110   | 0,006  | Phosphatidylcholines | PC aa C34:3 | 0,010 | 0,001 | 0,014    | 0,003 | 0,011 | 0,001 | 0,013   | 0,002 |
| Acylcarnitines | C3                  | 0,064  | 0,005 | 0,046    | 0,003 | 0,070  | 0,006 | 0,086   | 0,008  | Phosphatidylcholines | PC aa C42:0 | 0,010 | 0,001 | 0,008    | 0,001 | 0,010 | 0,001 | 0,015   | 0,002 |
| Acylcarnitines | C12                 | 0,035  | 0,003 | 0,036    | 0,006 | 0,050  | 0,002 | 0,066   | 0,005  | Phosphatidylcholines | PC ae C40:3 | 0,010 | 0,001 | 0,014    | 0,003 | 0,009 | 0,001 | 0,014   | 0,003 |
| Acylcarnitines | C4:1                | 0,031  | 0,002 | 0,031    | 0,004 | 0,035  | 0,001 | 0,051   | 0,005  | Phosphatidylcholines | PC aa C32:2 | 0,009 | 0,001 | 0,011    | 0,002 | 0,009 | 0,001 | 0,010   | 0,001 |
| Acylcarnitines | C3-OH               | 0,031  | 0,003 | 0,017    | 0,002 | 0,032  | 0,003 | 0,078   | 0,008  | Phosphatidylcholines | PC ae C40:1 | 0,008 | 0,001 | 0,009    | 0,002 | 0,008 | 0,000 | 0,010   | 0,001 |
| Acylcarnitines | C5:1-DC             | 0,030  | 0,001 | 0,029    | 0,002 | 0,034  | 0,001 | 0,046   | 0,003  | Phosphatidylcholines | PC ae C42:2 | 0,008 | 0,001 | 0,009    | 0,002 | 0,008 | 0,001 | 0,009   | 0,001 |
| Acylcarnitines | C6:1                | 0,029  | 0,002 | 0,029    | 0,004 | 0,033  | 0,002 | 0,047   | 0,004  | Phosphatidylcholines | PC aa C28:1 | 0,007 | 0,000 | 0,009    | 0,001 | 0,007 | 0,000 | 0,010   | 0,001 |
| Acylcarnitines | C3:1                | 0,016  | 0,001 | 0,018    | 0,002 | 0,022  | 0,001 | 0,026   | 0,003  | Phosphatidylcholines | PC ae C42:3 | 0,006 | 0,000 | 0,008    | 0,002 | 0,006 | 0,001 | 0,009   | 0,001 |
| Acylcarnitines | C14:2-OH            | 0,008  | 0,001 | 0,009    | 0,002 | 0,015  | 0,003 | 0,019   | 0,005  | Phosphatidylcholines | PC ae C40:2 | 0,004 | 0,000 | 0,006    | 0,001 | 0,004 | 0,000 | 0,006   | 0,001 |
| Acylcarnitines | C14:1               | 0,008  | 0,001 | 0,009    | 0,002 | 0,011  | 0,001 | 0,012   | 0,001  | Phosphatidylcholines | PC aa C42:1 | 0,003 | 0,000 | 0,003    | 0,001 | 0,004 | 0,000 | 0,004   | 0,001 |
| Acylcarnitines | C14:1               | 0,007  | 0,000 | 0,008    | 0,001 | 0,009  | 0,001 | 0,012   | 0,001  | Phosphatidylcholines | PC aa C32:3 | 0,003 | 0,000 | 0,003    | 0,001 | 0,003 | 0,000 | 0,003   | 0,000 |
| Acylcarnitines | C16                 | 0,007  | 0,001 | 0,008    | 0,001 | 0,010  | 0,000 | 0,011   | 0,001  | Phosphatidyl         |             |       |       |          |       |       |       |         |       |

## Supplemental Table 2

### Table of calculated net energy balance in each genotype.

Statistical significance was assumed at  $p < 0.05$ . Statistical differences between the four different genotypes are indicated by letters (n=5/6/6/5\*, n= 11/6/12/9# WT/ FGF21 KO/ UCP1 KO/ dKO).

|                                                       | WT           | FGF21 KO     | UCP1 KO     | dKO         |
|-------------------------------------------------------|--------------|--------------|-------------|-------------|
| <b>raw data</b>                                       |              |              |             |             |
| Body mass (g)*                                        | 34.4 ± 2.3a  | 33.4 ± 1.3a  | 26.7 ± 0.4b | 35.2 ± 0.8a |
| Energy intake (kJ/d)*                                 | 57.6 ± 1.5ab | 57.6 ± 4.1ab | 48.1 ± 2.0a | 63.3 ± 4.2b |
| Metabolic rate (kJ/d)*                                | 48.9 ± 0.6ab | 47.6 ± 1.2ab | 44.7 ± 1.4a | 50.1 ± 1.0b |
| Feces energy (kJ/d)#                                  | 2.2 ± 0.03   | 2.9 ± 0.3    | 2.6 ± 0.2   | 2.6 ± 0.1   |
| Urine energy (kJ/d)#                                  | 1.7 ± 0.2    | 1.6 ± 0.2    | 2.0 ± 0.2   | 2.3 ± 0.2   |
| <b>calculated energy balance</b>                      |              |              |             |             |
| Energy intake - energy outflow (kJ/d)                 | + 4.8        | + 5.5        | -1.2        | + 8.3       |
| Calculated accumulated energy over 8 weeks (kJ)       | 268,8        | 308,0        | -67,2       | 464,8       |
| Calculated fat accumulation over 8 weeks (g)          | 6,9          | 7,9          | -1,7        | 11,9        |
| <b>% energy partitioning (energy intake set 100%)</b> |              |              |             |             |
| Metabolic rate (%)                                    | 84,9         | 82,6         | 92,9        | 79,1        |
| Feces energy (%)                                      | 3,8          | 5,0          | 5,4         | 4,1         |
| Urine energy (%)                                      | 3,0          | 2,8          | 4,2         | 3,6         |
| <b>Released energy (%)</b>                            | 91,7         | 90,5         | 102,5       | 86,9        |

## Supplemental Table 3

### Related to Methods “Gene expression analysis”; Mouse qRT-PCR Primer Sequences

| Gene         | 5'3' primer (for)    | 3'5' primer (rev)     |
|--------------|----------------------|-----------------------|
| <i>Fgf21</i> | GCTGCTGGAGGACGGTTACA | CACAGGTCCCCAGGATGTTG  |
| <i>Hprt</i>  | CAGTCCCAGCGTCGTGATTA | AGCAAGTCTTTCAGTCCTGTC |

## Supplemental methods:

### Histology

Interscapular brown adipose tissue and inguinal white adipose tissue specimens were fixed in 4% paraformaldehyde (Roth chemicals) for 24hrs, embedded in low melting paraffin (Paraplast Plus®, Sigma Aldrich) for histological examination. Four µm-thick sections were cut using a rotary microtome (HSM55, Microm). Slides were mounted on superfrost glass slides (Menzel glass) dehydrated in increasing ethanol series and stained with hematoxylin and eosin (H&E) (Merck). Bright field images were obtained with the Keyence Microscope BZ-9000.
